# Supplementary material for: C1orf74 positively regulates the EGFR/AKT/mTORC1 signaling in lung adenocarcinoma cells
Source: PeerJ journal article supplement (doi:10.7717/peerj.13908), 2022-08-22
Supplement: C1orf74_raw_data.zip [file C1orf74_raw_data.zip]

## Sheet: Sheet1
GSE31210(t test p<0.0001)			GSE75037(t test p<0.0001)
Normal	Tumor		Normal	Tumor
122.998	170.769		6.389
121.789	192.564			6.877
119.362	167.307		6.72
71.7432	198.7			6.598
93.0938	157.83		5.597
87.9706	140.001			8.361
82.4095	153.381		5.968
107.185	137.791			6.482
104.698	242.049		6.595
99.2532	196.009			6.306
83.3608	151.964		5.603
129.291	174.483			4.982
66.5185	213.518		5.792
88.2748	103.442			7.42
58.0426	114.881		6.293
104.818	188.535			6.436
122.104	195.073		6.446
92.33	151.891			7.19
128.833	170.458		6.049
128.293	127.823			6.37
	200.67		5.322
	148.65			6.164
	208.619		6.34
	223.46			8.369
	122.176		6.571
	129.502			5.97
	133.773		5.72
	173.338			7.374
	127.793		4.579
	94.907			6.331
	121.189		6.17
	126.049			6.368
	165.906		6.192
	255.584			8.852
	162.27		6.77
	161.913			7.485
	151.779		6.176
	177.43			7.162
	216.168		6.146
	150.325			7.317
	125.687		5.883
	218.441			6.791
	250.478		5.747
	120.095			7.877
	192.949		6.662
	152.933			6.618
	172.46		5.453
	172.828			6.591
	100.801		5.928
	134.222			7.603
	105.343		6.192
	134.781			6.94
	121.98		5.65
	156.289			7.705
	117.032		5.954
	225.487			6.889
	173.227		5.739
	170.865			6.284
	114.751		5.825
	190.46			6.743
	174.331		5.354
	177.607			7.185
	84.7269		6.24
	175.184			7.543
	132.097		5.083
	70.0269			6.853
	93.4778		6.125
	90.0427			7.722
	140.878		6.525
	123.342			6.363
	150.879		5.789
	175.67			6.018
	146.545		5.921
	170.504			6.459
	245.024		6.489
	204.72			7.188
	166.65		6.797
	128.641			7.808
	118.683		6.013
	171.01			6.411
	147.218		5.895
	245.691			6.954
	55.7781		5.912
	137.708			7.437
	150.527		6.914
	100.061			7.005
	142.478		5.476
	159.959			7.235
	177.14		5.403
	116.461			7.112
	234.871		4.963
	122.655			6.976
	146.764		6.276
	229.935			7.364
	80.1218		6.047
	137.78			6.675
	172.125		5.274
	166.593			7.493
	139.701		5.802
	162.5			7.078
	124.573		5.282
	222.372			6.34
	198.498		5.096
	119.033			6.446
	125.028		5.823
	194.081			6.729
	98.1873		5.624
	202.903			7.139
	133.184		5.542
	133.983			7.747
	181.338		5.717
	241.577			8.126
	139.121		5.248
	163.284			6.699
	138.786		6.421
	115.576			7.977
	131.099		5.564
	111.661			6.409
	290.803		6.109
	223.924			6.982
	188.45		5.542
	118.689			6.146
	120.703		5.907
	213.997			7.294
	206.461		6.336
	133.614			6.728
	139.765		3.35
	160.508			6.727
	125.34		4.883
	163.113			7.105
	145.559		4.766
	132.234			5.194
	141.737		5.561
	286.995			5.766
	169.756		5.489
	182.805			7.754
	163.692		4.907
	151.087			5.768
	193.255		4.573
	130.666			4.766
	184.15		5.789
	164.548			5.758
	216.624		4.479
	203.215			6.387
	170.194		4.833
	79.4086			6.539
	133.549		4.878
	129.135			5.714
	160.972		4.365
	156.33			4.853
	169.068		4.096
	163.509			5.845
	153.062		5.174
	99.0809			7.04
	124.572		5.066
	83.8362			7.556
	128.138		6.298
	186.664			6.798
	288.664		5.991
	117.863			6.908
	143.202		5.336
	178.158			6.937
	299.822		6.336
	198.944			5.909
	152.222
	125.995
	134.614
	159.374
	188.778
	134.111
	111.146
	150.336
	140.626
	129.692
	105.116
	163.86
	218.24
	408.551
	158.104
	69.765
	107.775
	121.483
	136.329
	164.194
	145.343
	135.081
	126.204
	129.486
	188.892
	172.542
	291.907
	155.12
	128.475
	156.357
	88.0416
	72.6392
	189.005
	145.539
	159.251
	143.218
	206.361
	177.864
	250.02
	161.135
	189.301
	123.158
	104.896
	101.496
	158.468
	164.129
	105.676
	226.993
	107.977
	147.611
	182.803
	184.129
	152.893
	108.675
	149.793
	126.242
	184.194
	148.663
	210.12
	80.4867
	206.9
	141.721
